# Supplementary material
Source: Springer Nature journal article supplement (https://www.springermedizin.de/resource/supplementary/12971_2012_169_MOESM9_ESM.pdf/9595070)

**(A)****FITC**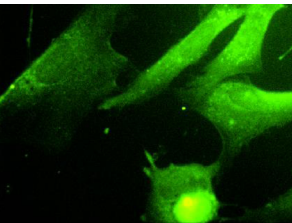**DAPI**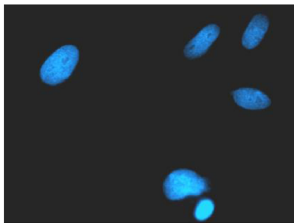**Merge**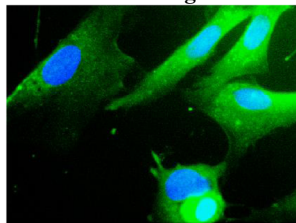**(B)****FITC**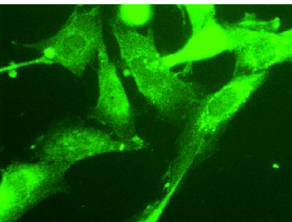**DAPI**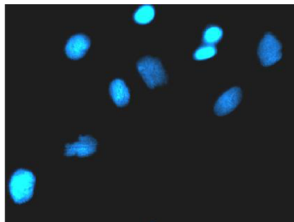**Merge**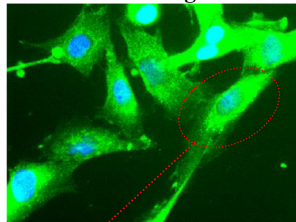**(C)**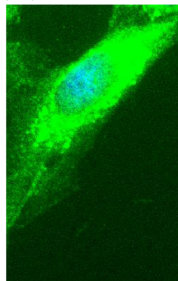

Supplement: MOESM9 [file 9595070]
